# Supplementary material for: Mass-determining role in the electrophoretic separation of colloidal plasmonic nanoparticle oligomers
Source: Royal Society of Chemistry journal article supplement (doi:10.1039/d2nr03585e), 2022-01-01
Supplement: d2nr03585e1.pdf [file d2nr03585e1.pdf]

## Supporting Information

### Mass-determining role in the electrophoresis separation of colloidal plasmonic nanoparticle oligomers

An Cao,<sup>†ab</sup> Jingyi Tan,<sup>†cd</sup> Dilong Liu,<sup>\*a</sup> Zhiming Chen,<sup>ab</sup> Liguang Dou,<sup>c</sup> Zhiqiang Liu,<sup>\*c</sup> and Yue Li<sup>\*a</sup>

*<sup>a</sup> Key Lab of Materials Physics, Anhui Key Lab of Nanomaterials and Nanotechnology, Institute of Solid State Physics, Hefei Institutes of Physical Science, Chinese Academy of Sciences, Hefei 230031, P. R. China.*

*<sup>b</sup> University of Science and Technology of China, Hefei 230026, P. R. China*

*<sup>c</sup> State Key Laboratory of Magnetic Resonance and Atomic and Molecular Physics, National Center for Magnetic Resonance in Wuhan, Wuhan Institute of Physics and Mathematics, Innovation Academy for Precision Measurement Science and Technology, Chinese Academy of Sciences, Wuhan 430071, P. R. China*

*<sup>d</sup> University of Chinese Academy of Sciences, Beijing 100049, P.R. China*

*<sup>e</sup> Beijing International S&T Cooperation Base for Plasma Science and Energy Conversion, Institute of Electrical Engineering, Chinese Academy of Sciences, Beijing 100190, P. R. China.*

*<sup>†</sup> These authors contribute equally to this work.*

\*Correspondences: [dliliu@issp.ac.cn](mailto:dliliu@issp.ac.cn), [zqliu@wipm.ac.cn](mailto:zqliu@wipm.ac.cn), [yueli@issp.ac.cn](mailto:yueli@issp.ac.cn),

## **Experimental section**

### **Materials**

Chloroauric acid ( $\text{HAuCl}_4$ , 99.9%), ethylene glycol (EG, >99.5%), silver nitrate ( $\text{AgNO}_3$ , >99.8%), 1,4-benzenediol, sodium hydrogen carbonate ( $\text{NaHCO}_3$ ), L-ascorbic acid (AA, >99.7%), agarose, sucrose, tris(hydroxymethyl)aminomethane (Tris, >99.9%), boric acid (>99.8%), ethylenediamine tetraacetic acid (EDTA, >99.5%) were obtained from Sinopharm Chemical Reagent Corporation. Poly (diallyldimethylammonium) chloride (PDDA,  $M_w=100\ 000\text{-}200\ 000$ , 20 wt% in water), fish sperm DNA (FSDNA) were purchased from Sigma-Aldrich. The deionized water (DI water,  $18.2\ \text{M}\Omega\ \text{cm}$  resistivity at  $25\ ^\circ\text{C}$ ) was produced by a Milli-Q integral water purification system. All chemicals and solvents were directly used as received without any further treatment.

### **Preparation of gold nanospheres**

The gold nanospheres with uniform size were synthesized by using a polyol-reduction method.<sup>1</sup> Briefly, EG (60 mL),  $\text{HAuCl}_4$  (1 M, 30  $\mu\text{L}$ ), PDDA (1.2 mL),  $\text{AgNO}_3$  aqueous solution (0.1M, 12  $\mu\text{L}$ ) were added to the glass vial in turn. The mixture solution was stirred vigorously for 3 min at room temperature and put into the oil bath at  $220\ ^\circ\text{C}$  for 2 h without stirring. The final products were centrifuged at 10 000 rpm for 20 min after cooling to the room temperature, and rinsed with DI water for three times. Then the gold nanospheres were re-dispersed in the 100  $\mu\text{L}$  DI water

and used for further assembly.

### **Preparation of Au/Ag core-shell nanocubes**

For a typical process of preparing Au/Ag core-shell nanocubes,  $\text{NaHCO}_3$  (1M, 600  $\mu\text{L}$ ),  $\text{AgNO}_3$  (1M, 120  $\mu\text{L}$ ), AA (1M, 600  $\mu\text{L}$ ) were added into the gold nanosphere seeds (60 mL).<sup>2</sup> Then the mixture solution was reacted at 75 °C for 2h. When the color of the reaction solution changed from wine red to brownish yellow, it indicated that the Au/Ag core-shell nanocubes had been successfully synthesized. The Au/Ag core-shell nanocubes were centrifuged at 10, 000 rpm for 20 min and rinsed repeatedly with DI water for three times. The final products were dispersed into 100  $\mu\text{L}$  of DI water for next assembly.

### **Preparation of gold bipyramids**

Gold bipyramids were synthesized by seed growth method.<sup>3</sup> The gold decahedron seeds were obtained by the following typical polyol-reduction method, EG (60 mL),  $\text{HAuCl}_4$  (1 M, 15  $\mu\text{L}$ ), PDDA (1.2 mL),  $\text{AgNO}_3$  aqueous solution (2M, 48  $\mu\text{L}$ ) were introduced to the glass vial. Subsequently, the mixture solution was put into the oil bath at 220 °C for 4 h. The color of the solution changed from bright yellow to wine red, indicating that gold decahedron seeds of uniform size were successfully prepared. After the gold decahedron seeds were cooled to room temperature, 1,4-benzenediol (0.25 M, 480  $\mu\text{L}$ ) and  $\text{HAuCl}_4$  (0.1 M, 600  $\mu\text{L}$ ) were added into the gold decahedron seeds colloid solution. Then the mixture solution was reacted at 50 °C for several hours. The final products were centrifuged at 10, 000 rpm

for three times and re-dispersed into 100  $\mu\text{L}$  of the DI water for subsequent assembly.

### **Synthesis and separation of nanoparticle oligomers**

Building blocks (gold nanospheres, Au/Ag core-shell nanocubes, gold bipyramids) were dispersed in FSDNA aqueous solution (5 mg/mL), then the mixture solution was slightly shaken for one minute to make it evenly mixed. Under the action of van der Waals force and electrostatic force, the nanoparticles were assembled and reached an equilibrium state within several seconds. The mixture nanoparticles solution was loaded in a 1% agarose gel and run in  $0.5\times\text{TBE}$  buffer at 100 V for 1 hour. Different quality oligomers moved toward the positive electrode of the electrophoresis instrument under the action of the electric field force, and divided into different bands. The sample bands were carefully cut and soaked in DI water for 12 hours.<sup>4</sup>

### **Simulation**

A 2D model was employed to qualitatively simulate the movements of the particles during gel electrophoresis. The simulation was conducted in COMSOL Multiphysics [COMSOL Multiphysics® v. 6.0. cn.comsol.com. COMSOL AB, Stockholm, Sweden.]. The qualitative model covers a  $100\text{ }\mu\text{m} \times 10\text{ }\mu\text{m}$  area. The Navier-Stokes equations were solved for flow field. And the electrostatic field was attached for offering the driving force. The particle tracing module with drag force was applied to simulate the interaction between the particles and the flow field. The complex collision and interaction between the particles and the gel was simplified as

periodically resetting the velocity of the particle to zero. To accelerate the simulation, the electric potential between the top side and the bottom side was set as 180 V. The viscosity of liquid was set as 0.07 Pa\*s.<sup>5</sup> And the density of liquid was approximated as the density of water.

## **2.6 Characterizations**

The morphology of the final products was characterized by a field emission scanning electron microscope (SEM, SU 8020) and a TEM (JEOL-2010). The optical spectrum of the final products was record by a spectrophotometer (FX 2000). The optical photographs of the samples were recorded by a digital camera.

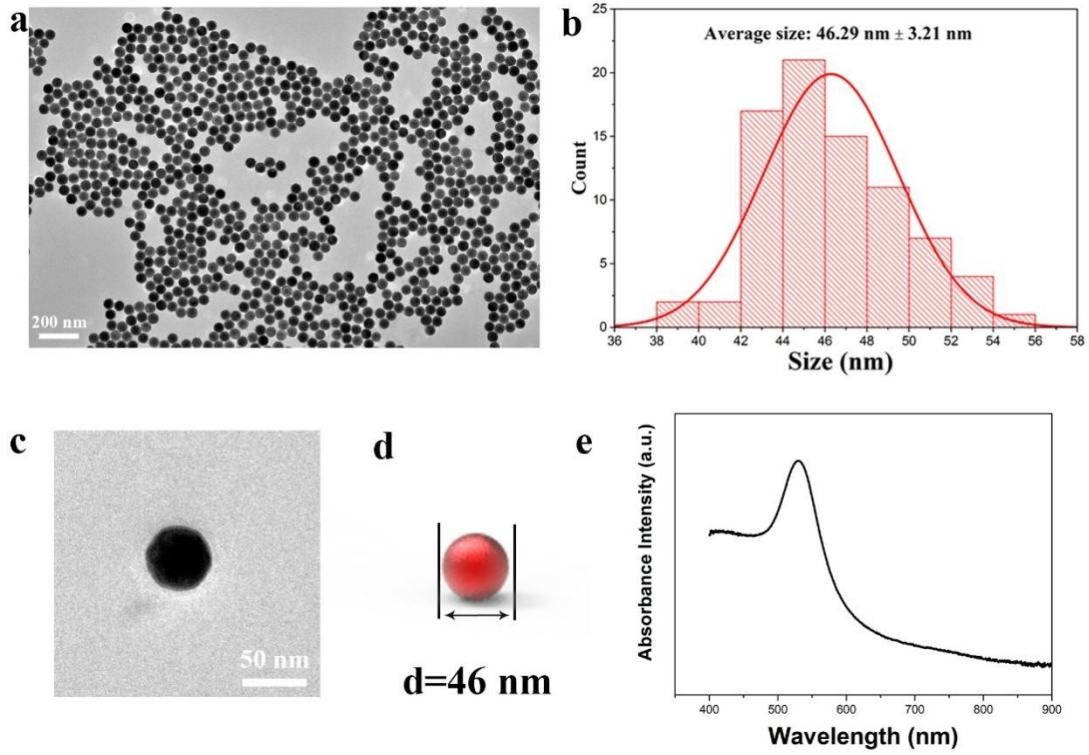

**Fig. S1** (a) Low-magnification TEM image of the small gold nanospheres. (b) The histogram of particle size statistics of the small gold nanospheres. (c) High-magnification TEM image of the small gold nanosphere. (d) The model of the small gold nanosphere. (e) The absorbance spectrum of the small gold nanospheres.

### Calculation of the mass of small nanosphere multimers

Monomer

$$M_{\text{Monomer}} = \rho V = \rho \frac{4}{3} \pi \left( \frac{d}{2} \right)^3$$

Here,  $M_{\text{monomer}}$  is the mass,  $\rho$  is the density of gold nanosphere,  $d$  is the diameter of the nanosphere.

In this model, the value of  $\rho$  is  $1.932 \times 10^4 \text{ kg/m}^3$ , the value of  $d$  is 46 nm.

Therefore

$$M_{monomer}=9.84\times10^{-16}g$$

In the same way, the masses of dimer, trimer, and tetramer can be calculated as

$19.68\times10^{-16}g$ ,  $29.52\times10^{-16}g$  and  $49.63\times10^{-16}g$ .

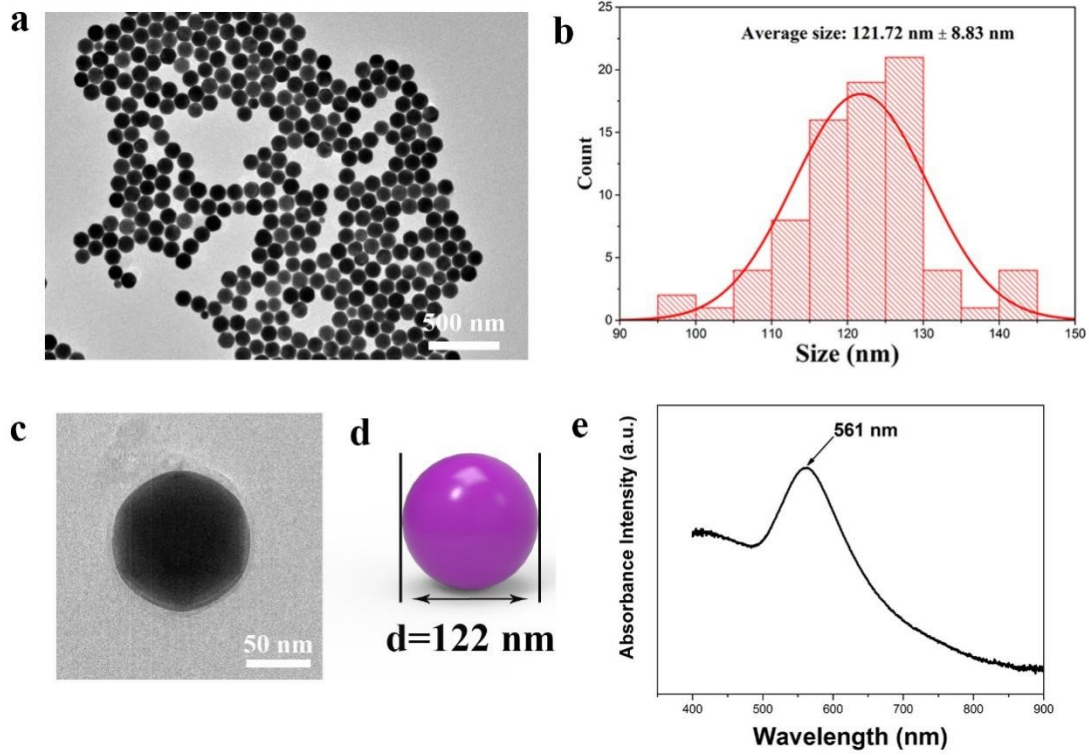

**Fig. S2** (a) Low-magnification TEM image of the large gold nanospheres. (b) The histogram of particle size statistics of the large gold nanospheres. (c) High-magnification TEM image of the large gold nanosphere. (d) The model of the large gold nanosphere. (e) The absorbance spectrum of the large gold nanospheres.

### Calculation of the mass of large nanosphere multimers

Monomer

$$M_{Monomer} = \rho V = \rho \frac{4}{3} \pi \left( \frac{d}{2} \right)^3$$

Here,  $M_{monomer}$  is the mass,  $\rho$  is the density of gold nanosphere,  $d$  is the diameter of the nanosphere.

In this model, the value of  $\rho$  is  $1.932 \times 10^4 \text{ kg/m}^3$ , the value of  $d$  is 122 nm.

Therefore

$$M_{monomer}=183.6\times10^{-16}g$$

Heterodimer

$$M_{Heterodimer}=M_{S-Monomer}+M_{B-Monomer}$$

$$M_{Heterodimer}=193.44\times10^{-16}g$$

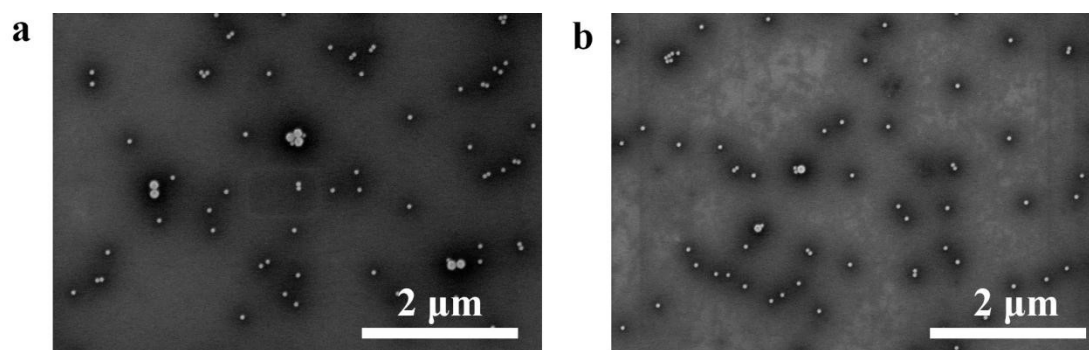

**Fig. S3** (a)-(b) SEM images of the colloidal mixture containing serials of gold oligomers.

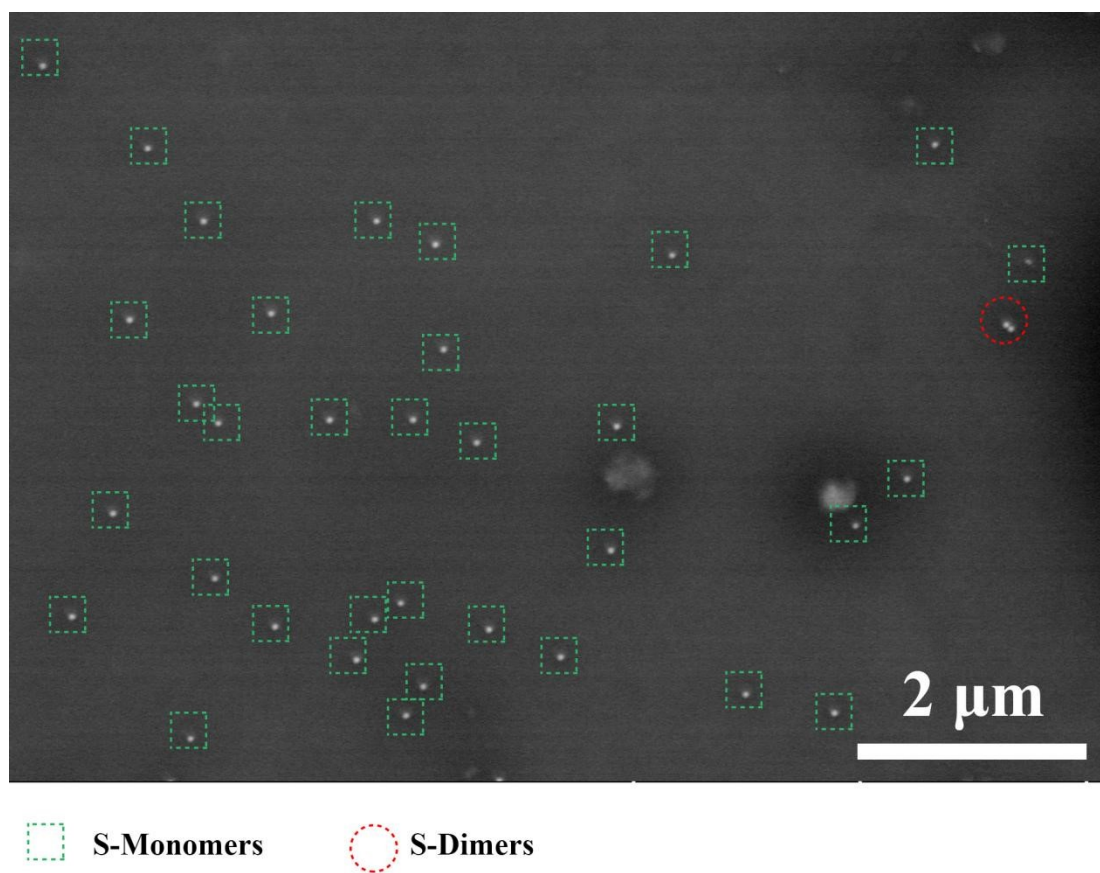

**Fig.S4** Low magnification SEM image of the oligomers recovered from the band I.

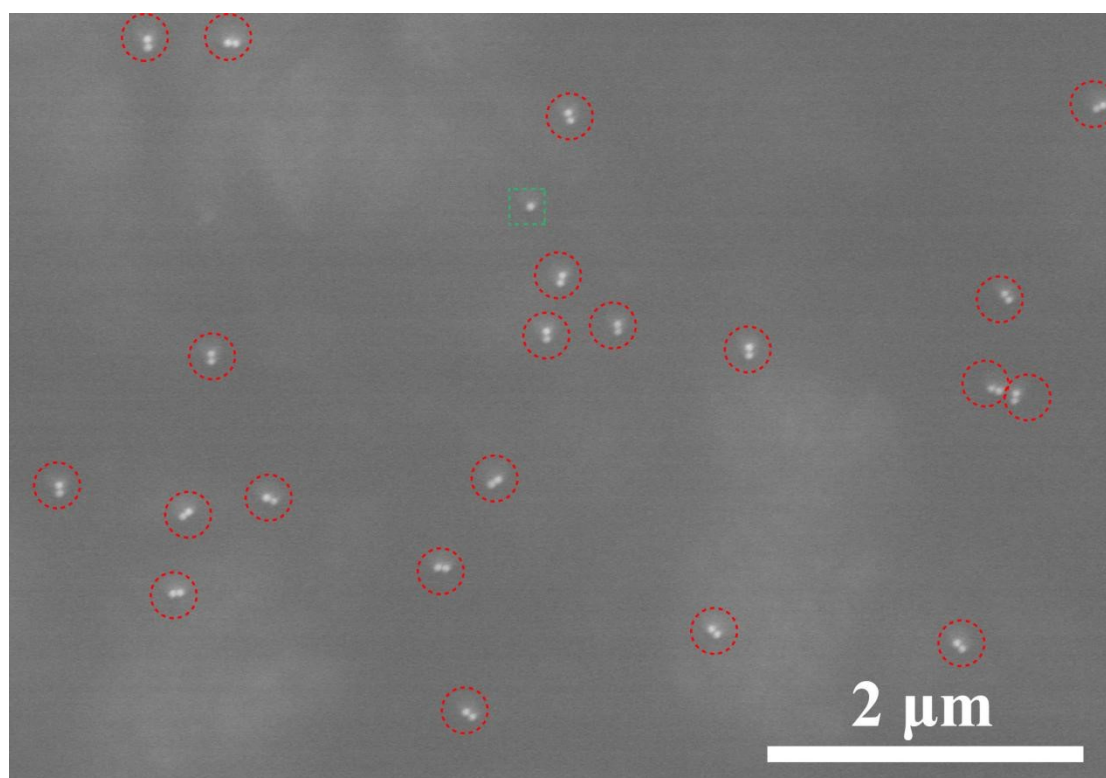

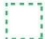 S-Monomers      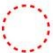 S-Dimers

**Fig. S5** Low magnification SEM image of the oligomers recovered from the band II.

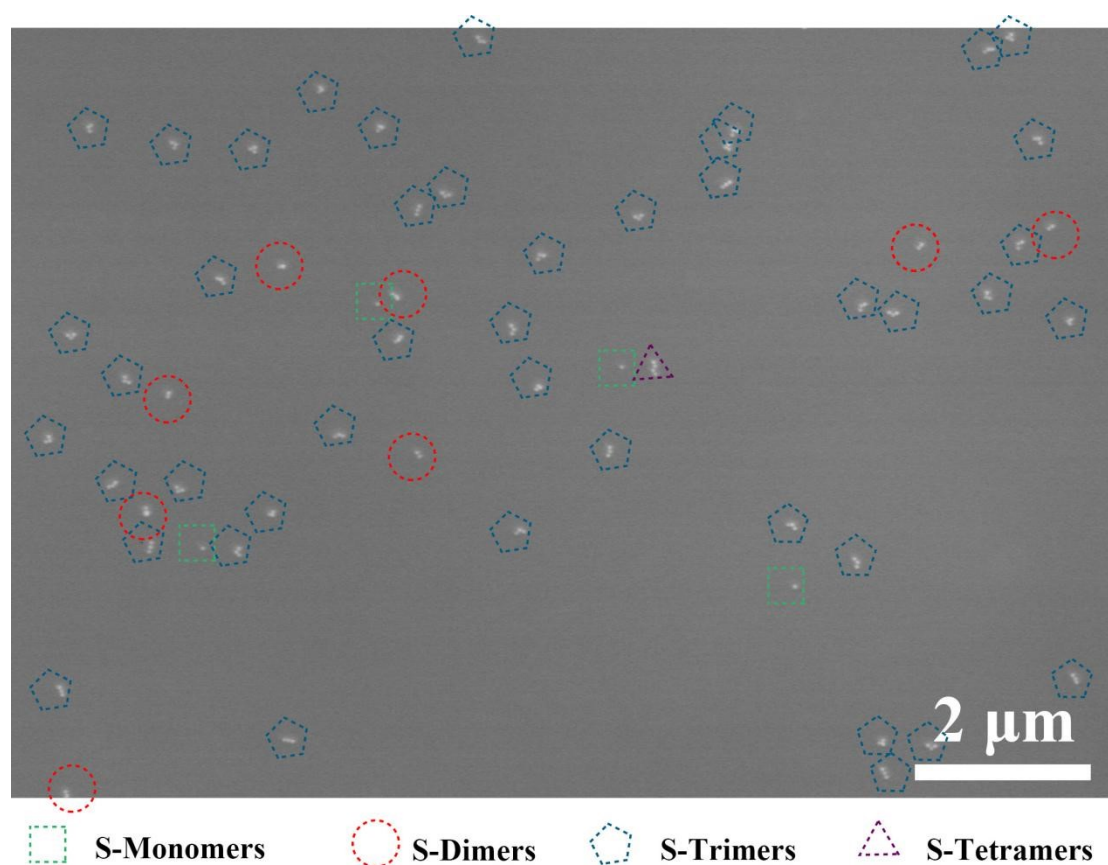

**Fig. S6** Low magnification SEM image of the oligomers recovered from the band III.

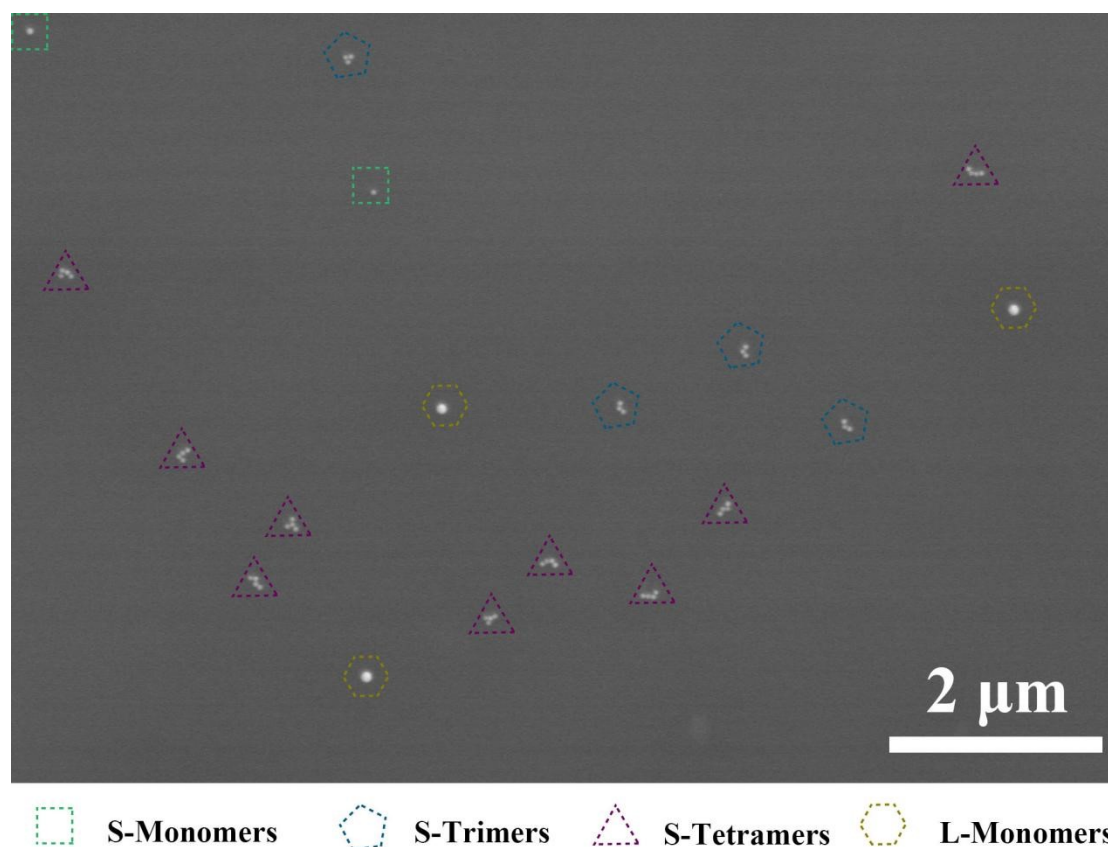

**Fig. S7** Low magnification SEM image of the oligomers recovered from the band IV.

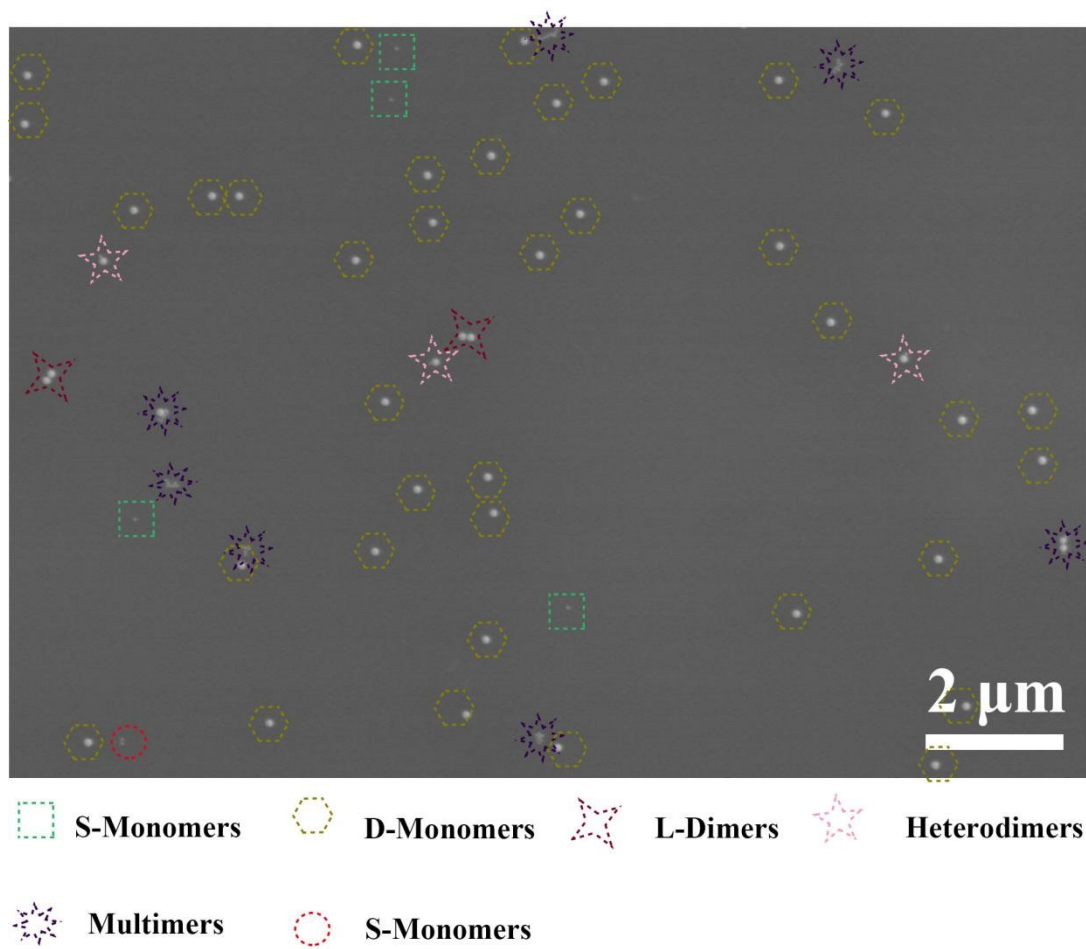

**Fig. S8** Low magnification SEM image of the oligomers recovered from the band V.

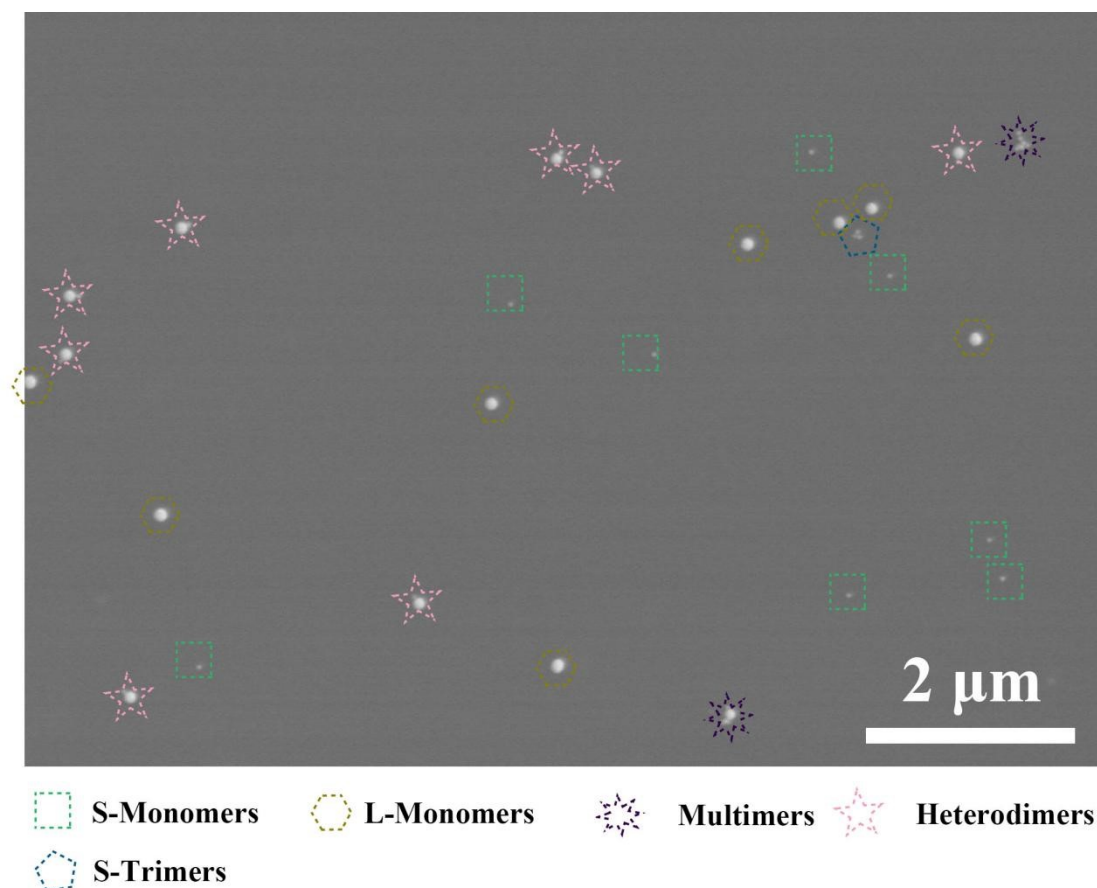

**Fig. S9** Low magnification SEM image of the oligomers recovered from the band VI.

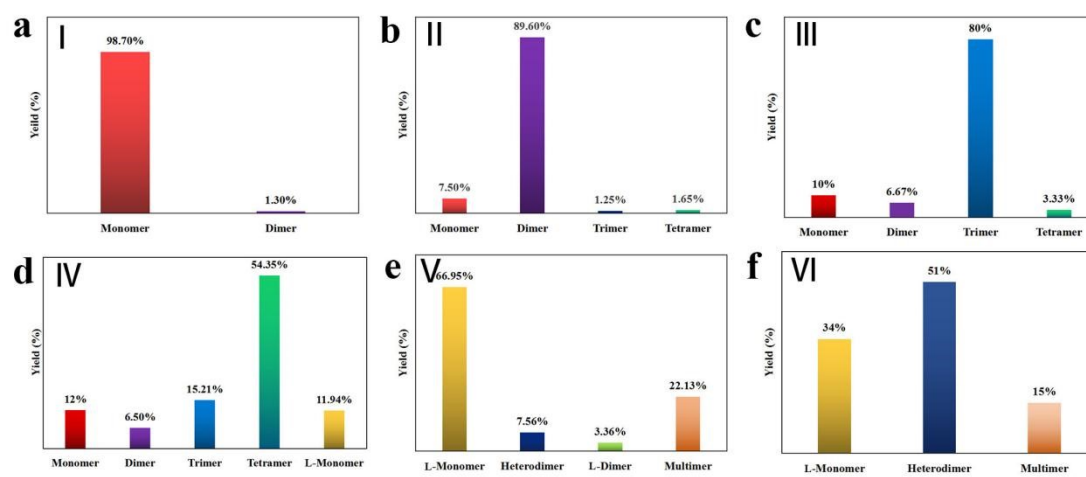

**Fig. S10** (a)-(f) The yield of the oligomers recovered from the band I- VII.

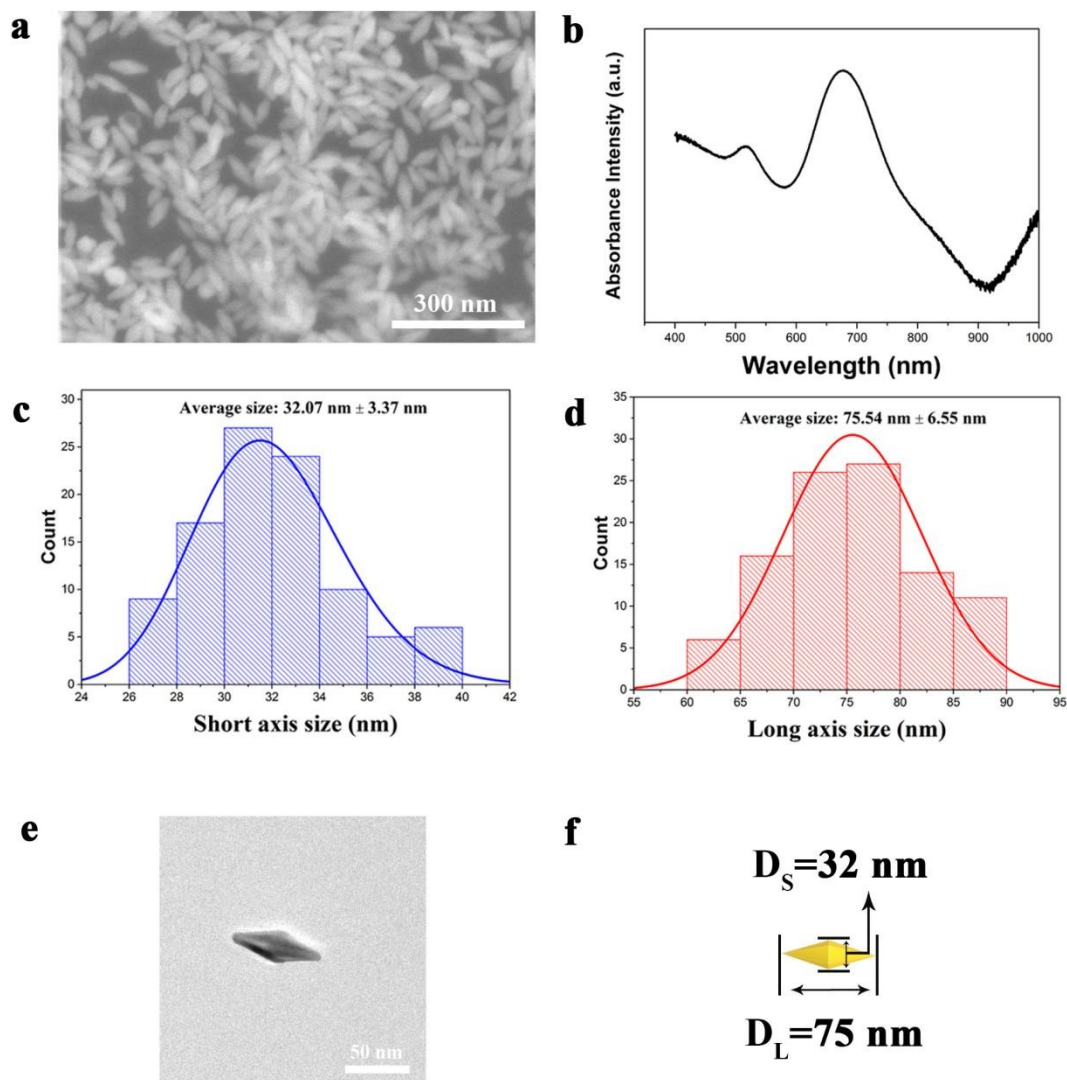

**Fig. S11** (a) The SEM image of the small gold bipyramids. (b) The absorbance spectrum of the small gold bipyramids. (c-d) The histogram of particle size statistics of the small gold nanospheres. (e) The TEM image of the small gold bipyramid. (f) The model of the small gold bipyramid.

### Calculation of the mass of the small gold bipyramid

In this experiment, the gold bipyramid is approximated as a splicing of two cones.

Therefore

$$V = 2 \times \pi \times \left( \frac{D_s}{2} \right)^2 \times \frac{D_L}{2} \times \frac{1}{3}$$

$$M = \rho V$$

Here, V is the volume of the small gold bipyramid, D<sub>s</sub> is the diameter of short shaft short axis of the gold bipyramid, D<sub>L</sub> is the diameter of long shaft short axis of the gold bipyramid.  $\rho$  is the density of the small gold bipyramid.

Therefore

$$M = 3.86 \times 10^{-16} \text{ g}$$

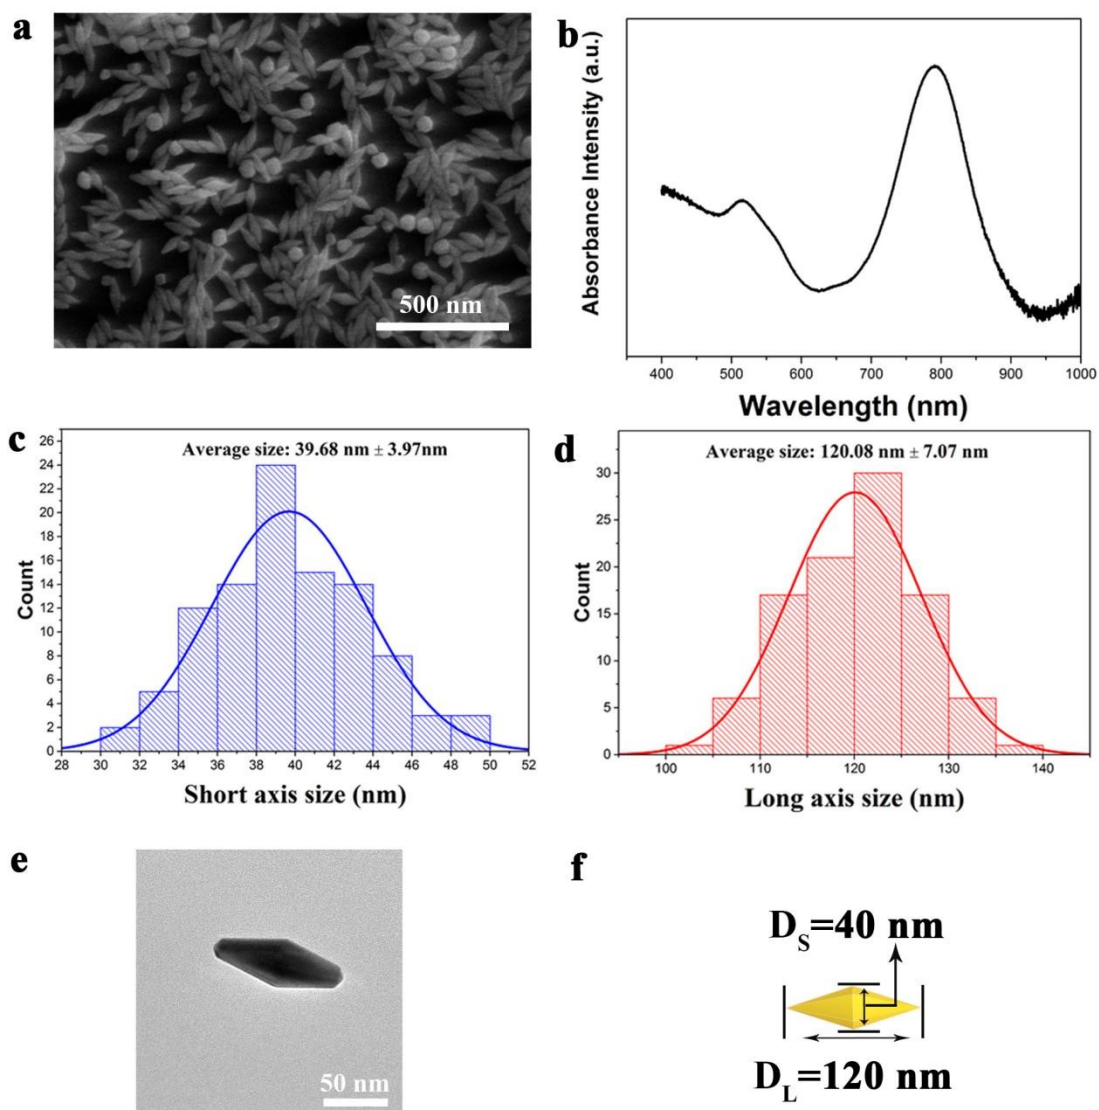

**Fig. S12** (a) The SEM image of the medium gold bipyramids. (b) The absorbance spectrum of the medium gold bipyramids. (c-d) The histogram of particle size statistics of the medium gold nanospheres. (e) The TEM image of the medium gold bipyramid. (f) The model of the medium gold bipyramid.

### Calculation of the mass of the medium gold bipyramid

$$V = 2 \times \pi \times \left( \frac{D_s}{2} \right)^2 \times \frac{D_L}{2} \times \frac{1}{3}$$

$$M = \rho V$$

Therefore

$$M = 9.7 \times 10^{-16} \text{ g}$$

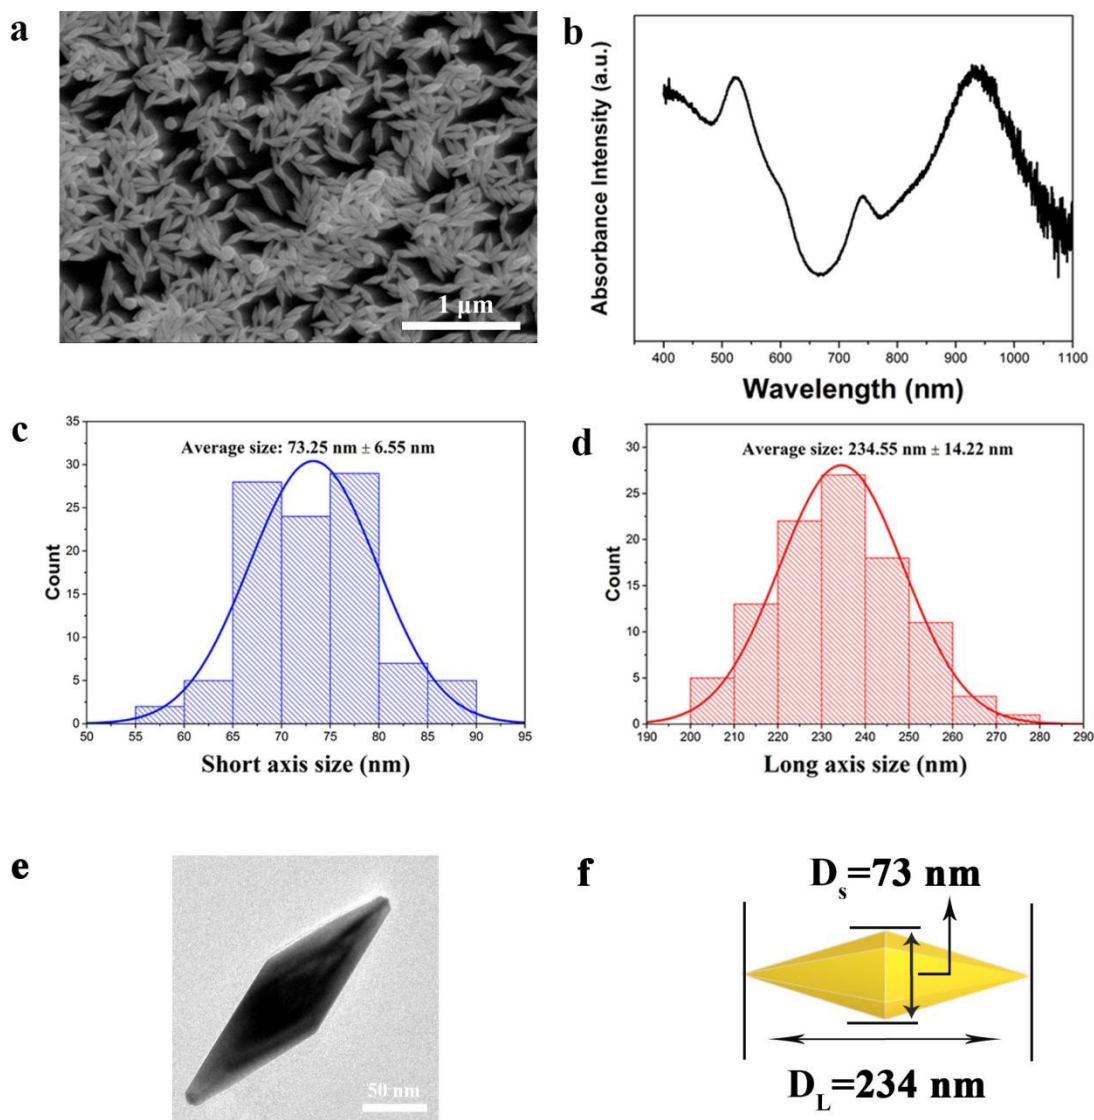

**Fig. S13** (a) The SEM image of the large gold bipyramids. (b) The absorbance spectrum of the large gold bipyramids. (c-d) The histogram of particle size statistics of the large gold nanospheres. (e) The TEM image of the large gold bipyramid. (f) The model of the large gold bipyramid.

### Calculation of the mass of the large gold bipyramid

In this experiment, the gold bipyramid is approximated as a splicing of two cones.

Therefore

$$V = 2 \times \pi \times \left( \frac{D_s}{2} \right)^2 \times \frac{D_L}{2} \times \frac{1}{3}$$

$$M = \rho V$$

Here, V is the volume of the large gold bipyramid, D<sub>s</sub> is the diameter of short shaft short axis of the gold bipyramid, D<sub>L</sub> is the diameter of long shaft short axis of the gold bipyramid.  $\rho$  is the density of the large gold bipyramid.

Therefore

$$M = 64.78 \times 10^{-16} \text{ g}$$

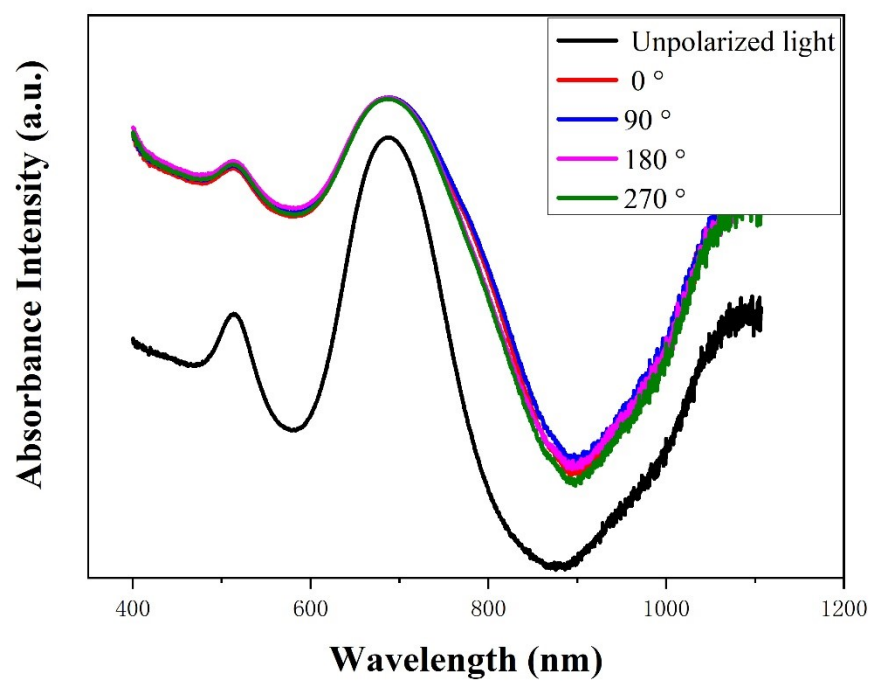

**Fig. S14** The Absorption spectrum of band I in Figure 3b after adding polarizer.

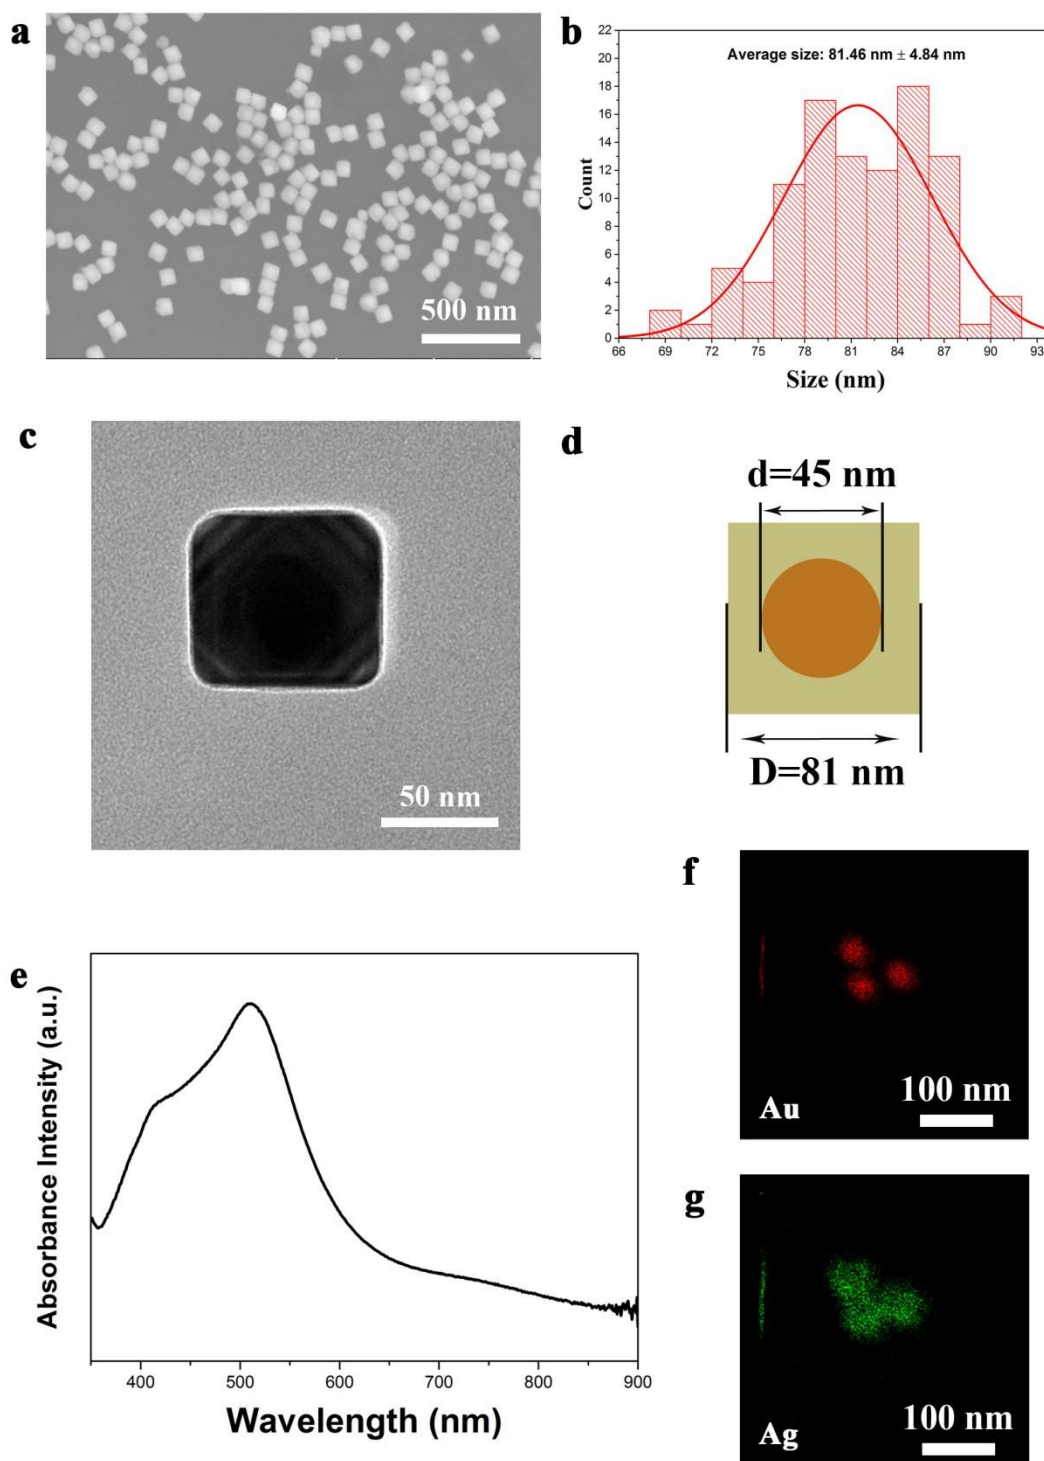

**Fig. S15** (a) The SEM image of the Au/Ag core-shell nanocubes. (b) The histogram of particle size statistics of the Au/Ag core-shell nanocubes. (c) The TEM image of the Au/Ag core-shell nanocubes. (d) The model of the Au/Ag core-shell nanocubes. (e) The absorbance spectrum of the Au/Ag core-shell nanocubes. (f-g) EDS elemental

mapping of Au and Ag, respectively.

### Calculation of the mass and volume of the Au/Ag core-shell nanocubes

$$V_{cube} = D^3$$

$$V_{cube} = 531441 \text{ nm}^3$$

$$V_{sphere} = \frac{4}{3} \times \pi \times \left(\frac{d}{2}\right)^3$$

$$V_{sphere} = 47688 \text{ nm}^3$$

$$M_{cube} = M_{Au} + M_{Ag}$$

$$M_{cube} = \rho_{Au} V_{sphere} + \rho_{Ag} (V_{cube} - V_{sphere})$$

$$M_{cube} = 60 \times 10^{-16} \text{ g}$$

Here,  $V_{cube}$  is the volume of the Au/Ag core-shell nanocubes,  $V_{sphere}$  is the volume of the gold core nanosphere.  $M_{gold}$  is the mass of the gold.  $M_{Ag}$  is the mass of the Ag.  $M_{cube}$  is the mass of the Au/Ag core-shell nanocubes.  $\rho_{Au}$  is the density of the Au ( $1.932 \times 10^4 \text{ kg/m}^3$ ).  $\rho_{Ag}$  is the density of the Ag ( $1.05 \times 10^4 \text{ kg/m}^3$ ).

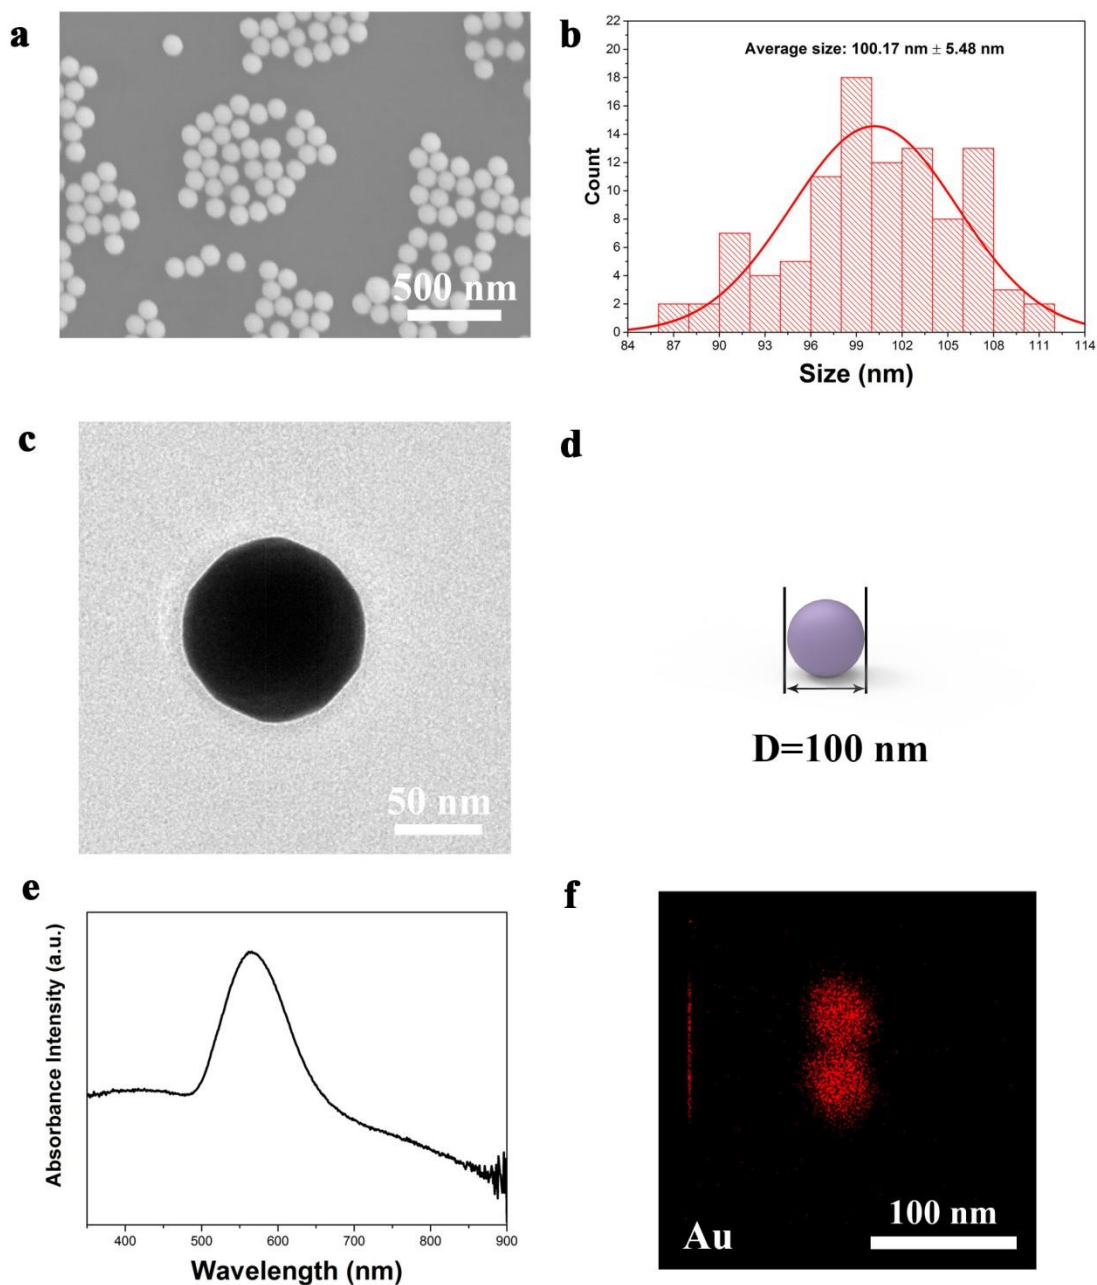

**Fig. S16** (a) The SEM image of the medium gold nanospheres. (b) The histogram of particle size statistics of the medium gold nanospheres. (c) The TEM image of the medium gold nanosphere. (d) The model of the medium gold nanosphere. (e) The absorbance spectrum of the medium gold nanospheres. (f) EDS elemental mapping of gold.

### Calculation of the mass and volume of the medium gold nanospheres

$$V = \frac{4}{3}\pi\left(\frac{D}{2}\right)^3$$

$$M = \rho V$$

Here, M is the mass,  $\rho$  is the density of gold nanosphere ( $1.932 \times 10^4 \text{ kg/m}^3$ ), D is the diameter of the nanosphere. V is the volume of the gold nanosphere.

$$V = 523333 \text{ nm}^3$$

$$M = 101.1 \times 10^{-16} \text{ g}$$

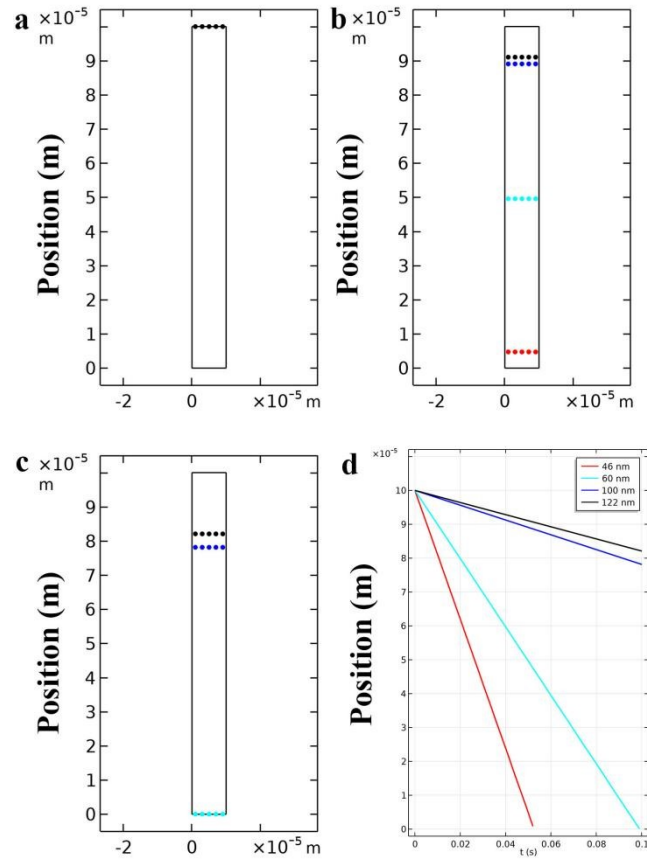

**Fig. S17** The simulation screenshots of the position of the gold nanospheres with different diameter (46 nm, 60 nm, 100 nm and 122 nm) at (a) 0 s, (b) 36000 s and (c) 72000 s. (d) The position of the gold nanospheres as a function of time.

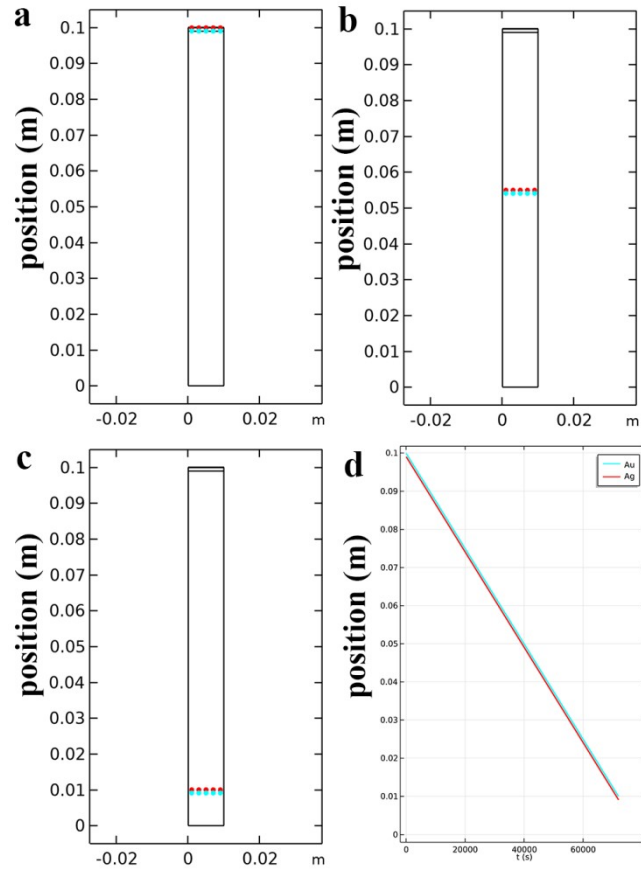

**Fig. S18** The simulation screenshots of the position of the gold nanospheres and the Au/Ag core-shell nanocubes at (a) 0 s, (b) 36000 s and (c) 72000 s (no collision). (d) The position of the gold nanospheres and the Au/Ag core-shell nanocubes as a function of time (no collision).

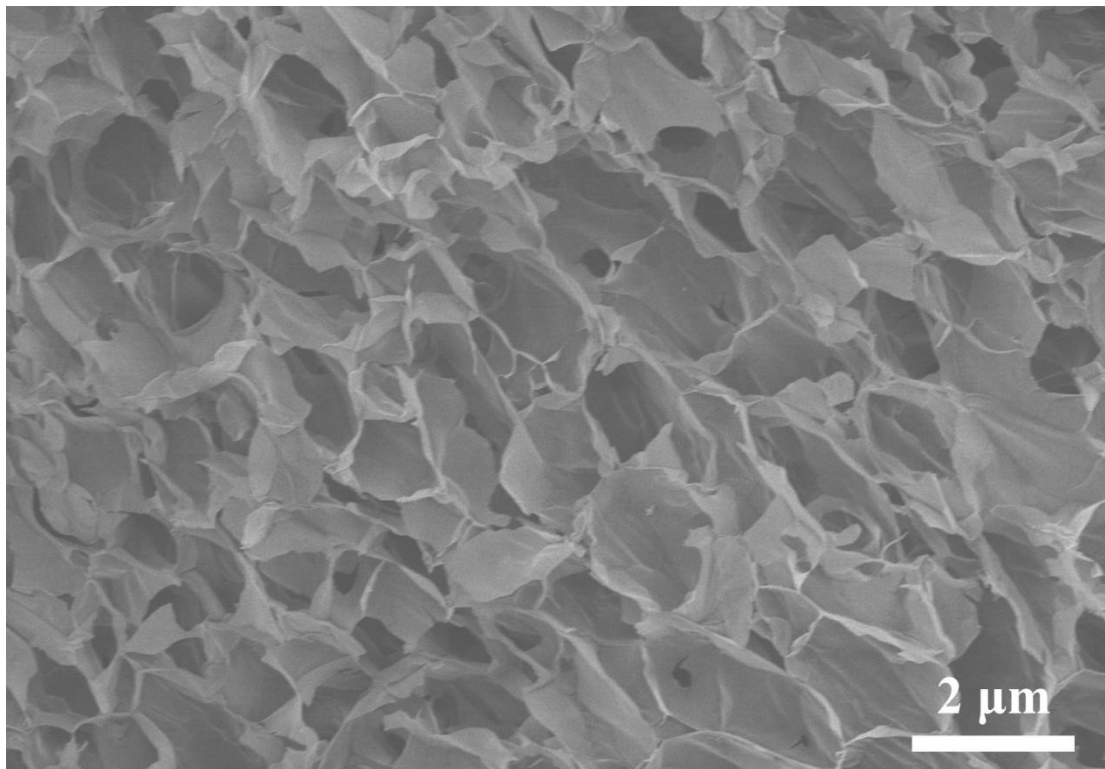

**Fig. S19** SEM image of gel networks obtained by the freeze drying technique.

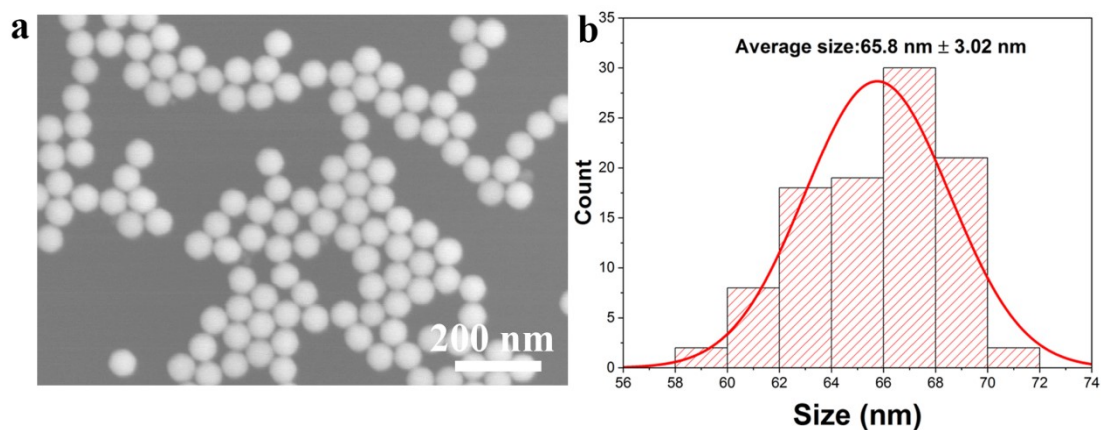

**Fig. S20** (a) The SEM image of the gold nanospheres. (b) The histogram of particle size statistics of the gold nanospheres.

### Calculation of the mass of the gold nanospheres

$$V = \frac{4}{3} \pi \left( \frac{D}{2} \right)^3$$

$$M = \rho V$$

Here, M is the mass,  $\rho$  is the density of gold nanosphere ( $1.932 \times 10^4 \text{ kg/m}^3$ ), D is the diameter of the nanosphere. V is the volume of the gold nanosphere.

$$V = 150456 \text{ nm}^3$$

$$M = 29 \times 10^{-16} \text{ g}$$

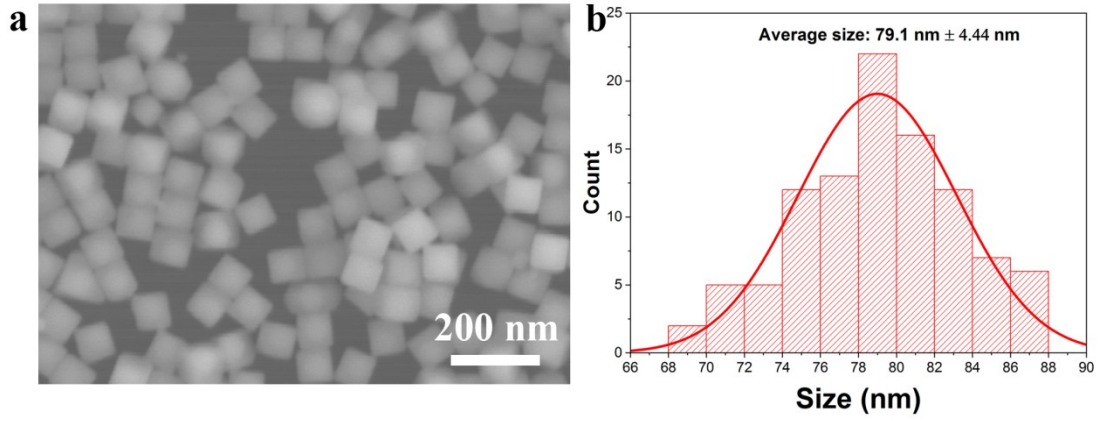

**Fig. S21** (a) The SEM image of the Au/Ag core-shell nanocubes. (b) The histogram of particle size statistics of the Au/Ag core-shell nanocubes.

### Calculation of the mass of the Au/Ag core-shell nanocube

$$V_{cube} = D^3$$

$$V_{cube} = 512000 \text{ nm}^3$$

Since the Au/Ag core-shell nanocubes were grown from gold nanospheres (Figure S18) as seeds, therefore:

$$V_{sphere} = 150456 \text{ nm}^3$$

$$M_{cube} = M_{Au} + M_{Ag}$$

$$M_{cube} = \rho_{Au} V_{sphere} + \rho_{Ag} (V_{cube} - V_{sphere})$$

$$M_{cube} = 67 \times 10^{-16} \text{ g}$$

Here,  $V_{cube}$  is the volume of the Au/Ag core-shell nanocube,  $V_{sphere}$  is the volume of the gold core nanosphere.  $M_{gold}$  is the mass of the gold.  $M_{Ag}$  is the mass of the Ag.  $M_{cube}$  is the mass of the Au/Ag core-shell nanocube.  $\rho_{Au}$  is the the density of the gold ( $1.932 \times 10^4 \text{ kg/m}^3$ ).  $\rho_{Ag}$  is the the density of the Ag ( $1.05 \times 10^4 \text{ kg/m}^3$ ).

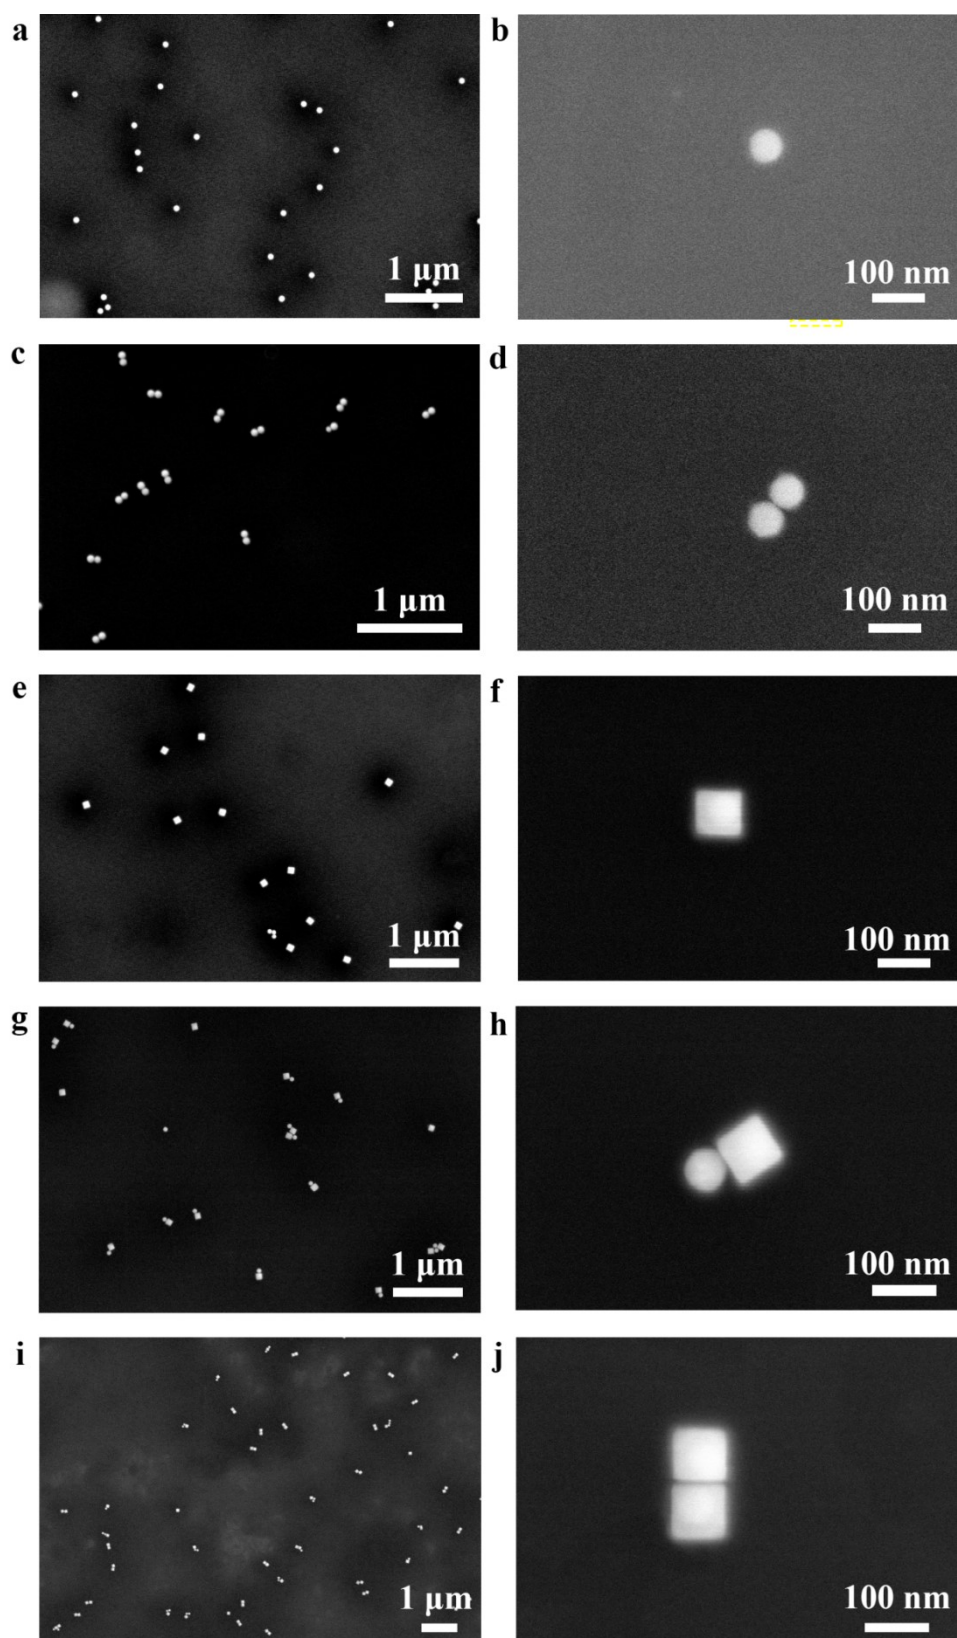

**Fig. S22** (a-j) Low- and high- magnification SEM images of products recovered from the bands I-V.

## Reference

- 1 T. Zhang, X. Li, C. Li, W. Cai and Y. Li, *Chem. Mater.*, 2021, **33**, 2593-2603.
- 2 T. Zhang, F. Zhou, L. Hang, Y. Sun, D. Liu, H. Li, G. Liu, X. Lyu, C. Li and W. Cai, *J. Mater. Chem. C*, 2017, **5**, 11039-11045.
- 3 T. Zhang, X. Li, Y. Sun, D. Liu, C. Li, W. Cai and Y. Li, *Chem. Sci.*, 2021, **12**, 12631-12639.
- 4 D. Liu, L. Fang, F. Zhou, H. Li, T. Zhang, C. Li, W. Cai, Z. Deng, L. Li and Y. Li, *Adv. Funct. Mater.*, 2018, **28**, 1707392.
- 5 X. X. Ye, S. Mori, M. Yamada, J. Inoue, Z. Q. Xu and T. Hirokawa, *Electrophoresis*, 2013, **34**, 583-589.
